# Supplementary material for: Photocatalytic C–F alkylation of trifluoromethyls using o-phosphinophenolate: mechanistic insights and substrate prediction
Source: Royal Society of Chemistry journal article supplement (doi:10.1039/d3cc03264g), 2023-01-01
Supplement: d3cc03264g2.pdf [file d3cc03264g2.pdf]

Supplementary Information for  
Photocatalytic C–F alkylation of trifluoromethyls using *o*-  
Phosphinophenolate: Mechanistic insights and substrate  
prediction

Rongrong Li, <sup>a,b,c</sup> Xinzhen Yang, <sup>\*a,b,c</sup> and Wei Guan <sup>\*d</sup>

<sup>a</sup> State Key Laboratory for Structural Chemistry of Unstable and Stable Species,  
Institute of Chemistry Chinese Academy of Sciences, Beijing 100190, P. R. China

E-mail: [xyang@iccas.ac.cn](mailto:xyang@iccas.ac.cn)

<sup>b</sup> University of Chinese Academy of Sciences, Beijing 100049, P. R. China

<sup>c</sup> Department of Chemistry, University of Washington, Seattle, WA 98195

<sup>d</sup> Institute of Functional Material Chemistry, Faculty of Chemistry, Northeast Normal  
University, Changchun 130024

E-mail: [guanw580@nenu.edu.cn](mailto:guanw580@nenu.edu.cn)

**Table of Contents**

|                                                                           |       |
|---------------------------------------------------------------------------|-------|
| Computational details.                                                    | S2    |
| Different paths of defluorination.                                        | S3    |
| The energy difference of radical relay calculated using MP2 and B3LYP-D3. | S4    |
| Different paths of hydrogen atom transfer.                                | S5–S6 |
| Different paths of photocatalyst regeneration.                            | S7    |
| The scanning potential energy surface.                                    | S8–S9 |
| Different paths of hydrodefluorination.                                   | S10   |
| Reference.                                                                | S11   |

## Computational details

The Gaussian 09 suite of ab initio programs<sup>1</sup> was employed to perform the ground state and excited state geometry optimizations, vibrational frequency calculations, and intrinsic reaction coordinate (IRC) at the B3LYP functional with Grimme's GD3 dispersion correction, referring to the benchmark calculations in previous studies,<sup>2-5</sup> and def2TZVP basis set.<sup>6-7</sup> The triplet excited states were optimized by using time-dependent density functional theory (TDDFT) at the same level. The accuracy of numerical integrations is at the ultrafine grid (99,590) level. The solvent effect of N,N-dimethylacetamide ( $\epsilon = 37.78$ ) was considered by using the integral equation formalism polarizable continuum (IEFPCM)<sup>8</sup> solvation model with the SMD radii.<sup>9</sup> The Multiwfn program was used to perform spin population and natural population analysis.<sup>10</sup>

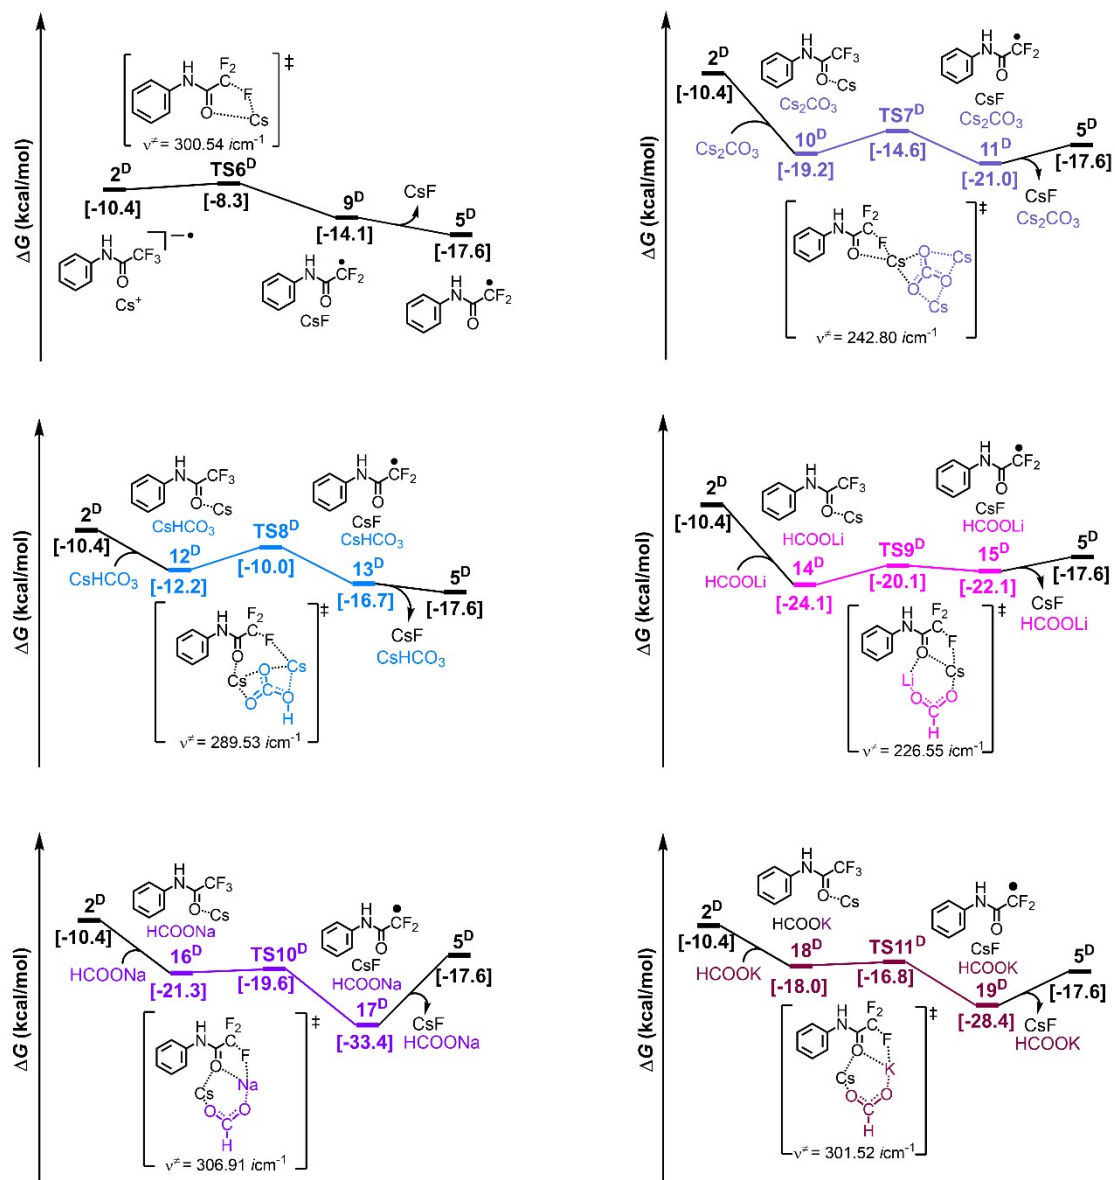

Figure S1 Different paths of N-phenyl-2,2,2-trifluoroacetamide defluorination.

Table S1 The calculated free energy difference using B3LYP-D3 and MP2 between two double-bonded carbons coupling with carbon radical in **5<sup>D</sup>**.

|          | $\Delta\Delta G$ (kcal/mol) |
|----------|-----------------------------|
| B3LYP-D3 | 3.3                         |
| MP2      | 3.0                         |

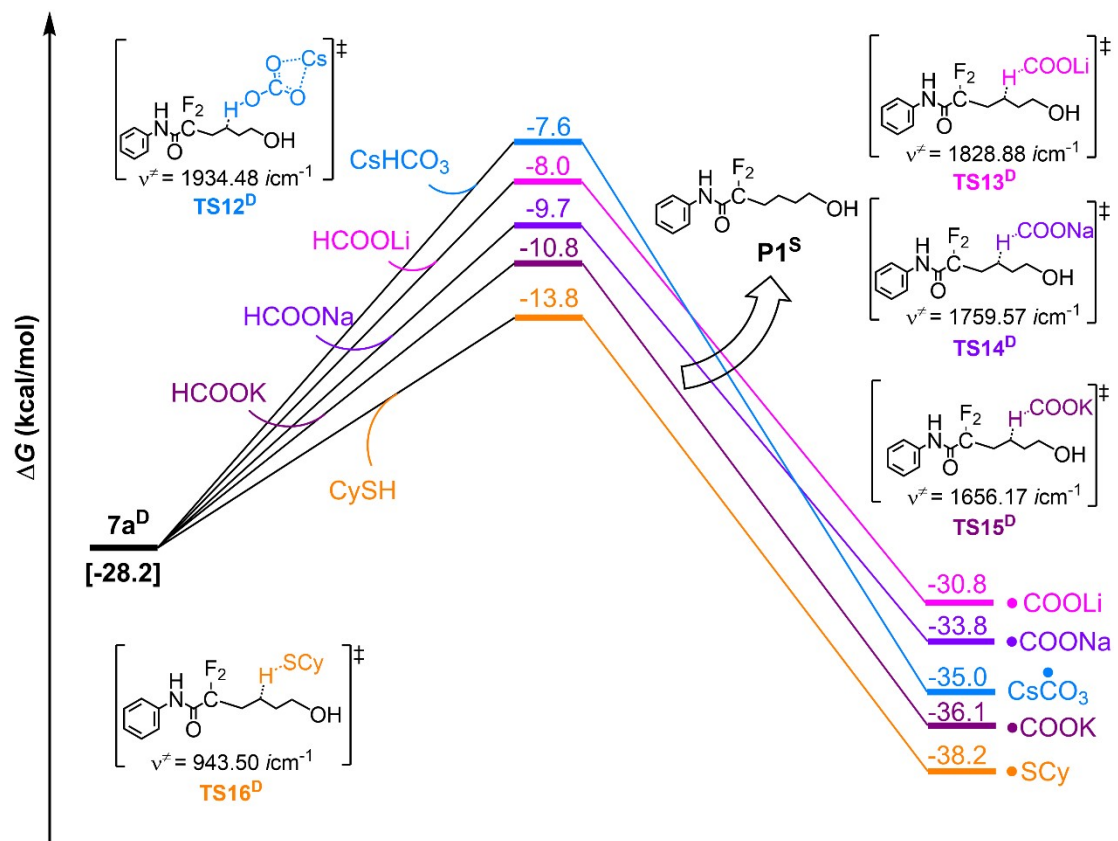

Figure S2 Different paths of hydrogen atom transfer from different additives.

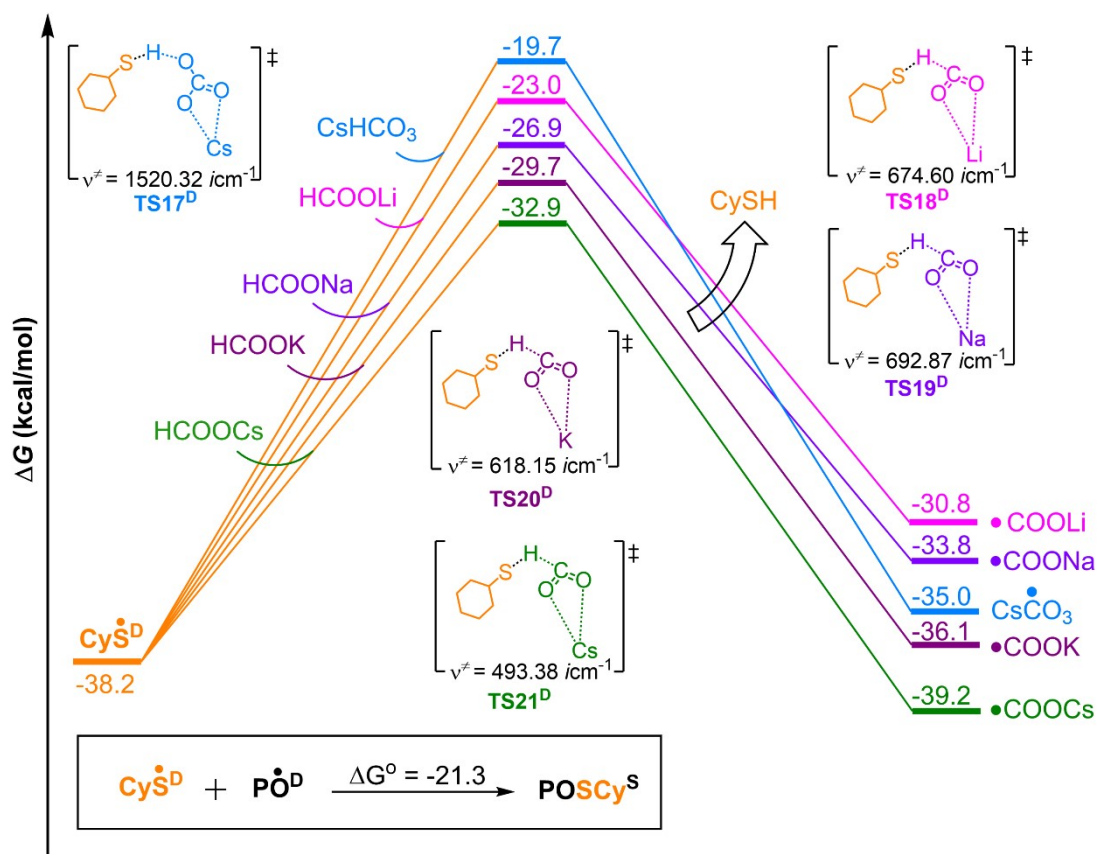

Figure S3 Different paths of hydrogen atom transfer to regenerate CySH.

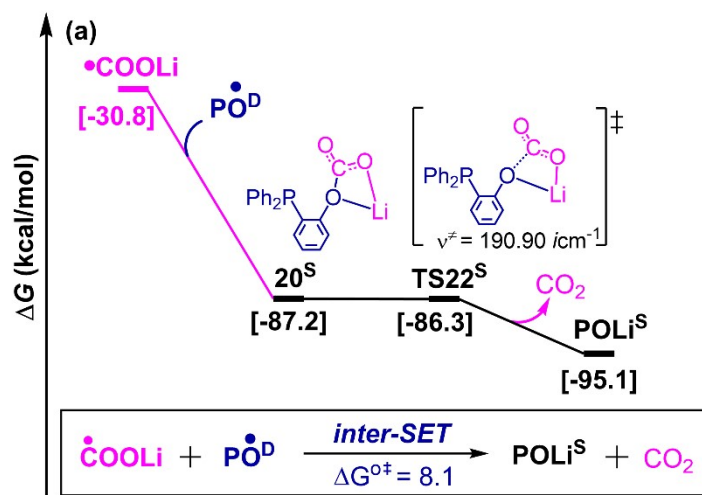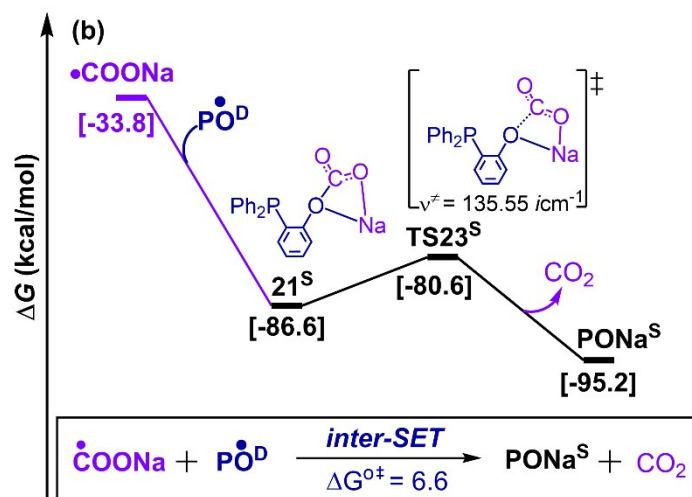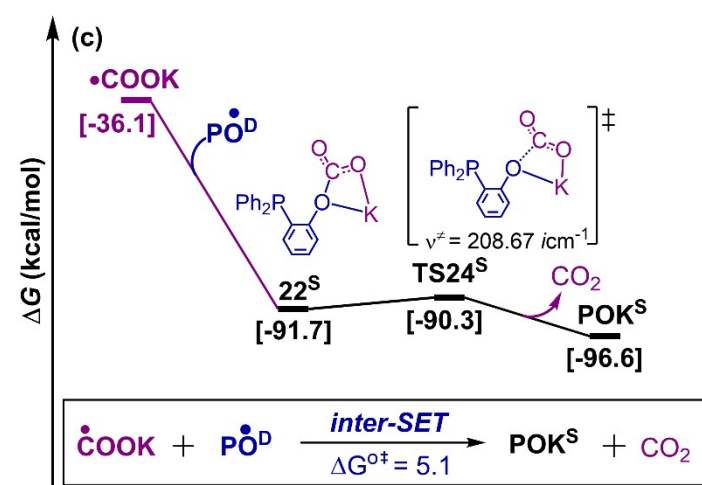

Figure S4 Different paths of photocatalyst regeneration assisted by formate radical.

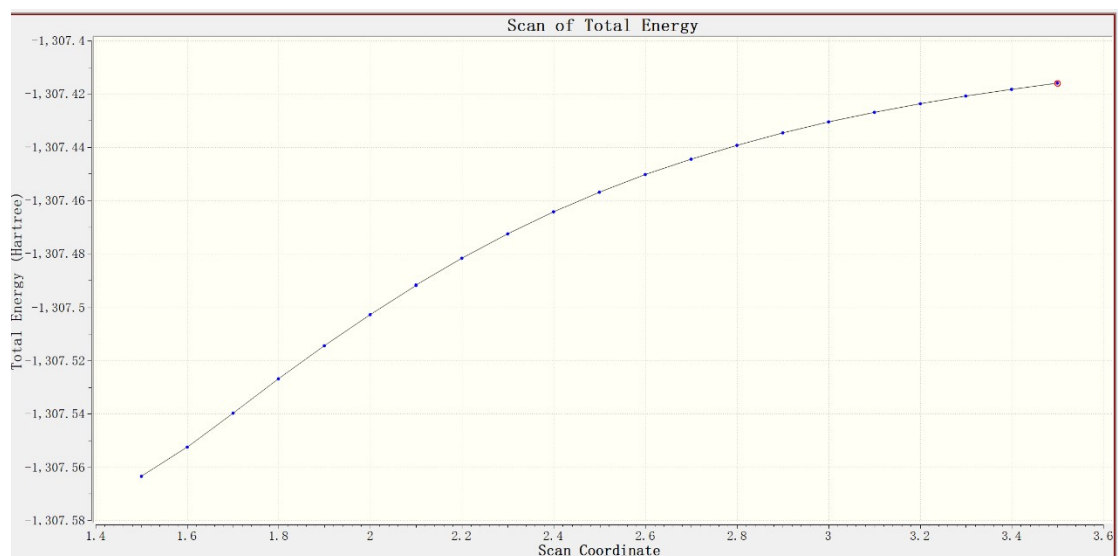

Figure S5 The scanning results of potential energy surface for coupling process between lithium formate radical and  $\text{PO}^\bullet$  radical.

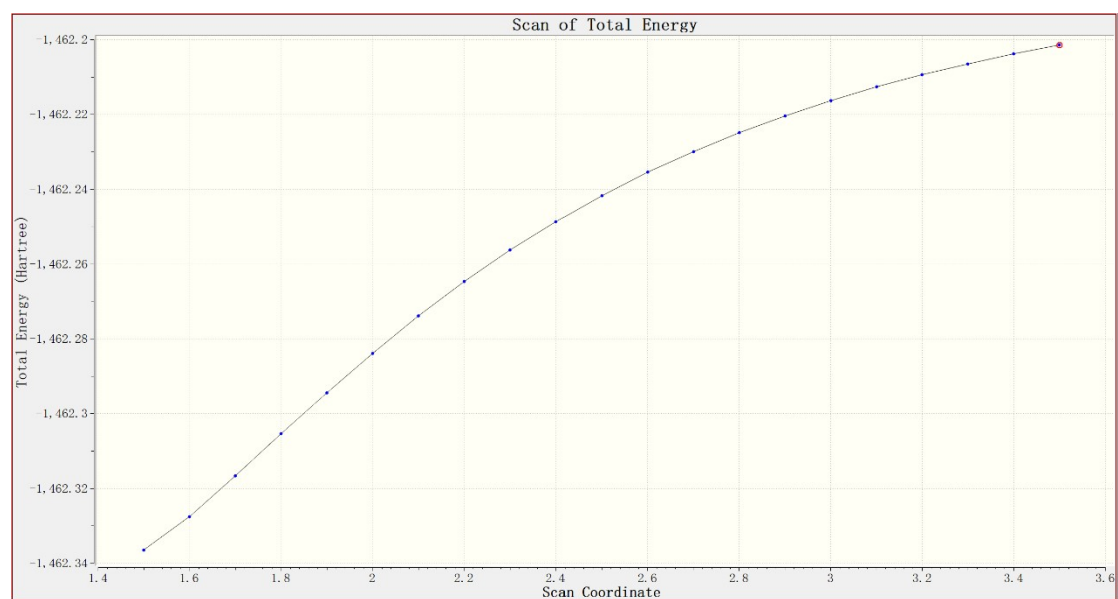

Figure S6 The scanning results of potential energy surface for coupling process between sodium formate radical and  $\text{PO}^\bullet$  radical.



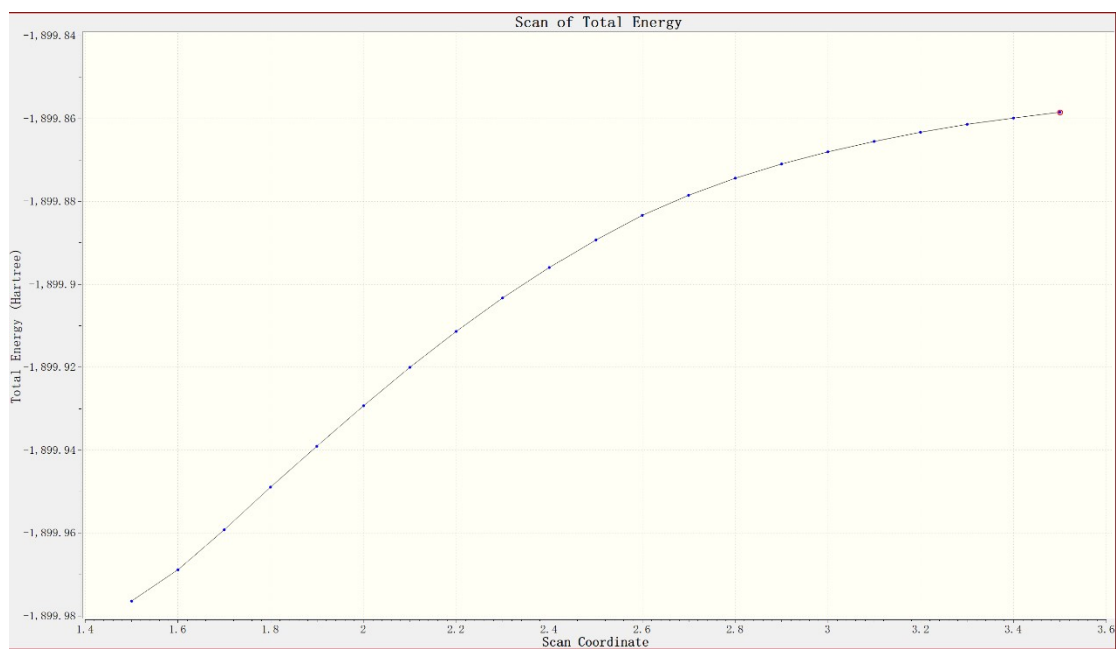

Figure S7 The scanning results of potential energy surface for coupling process between potassium formate radical and  $\text{PO}^{\bullet}$  radical.

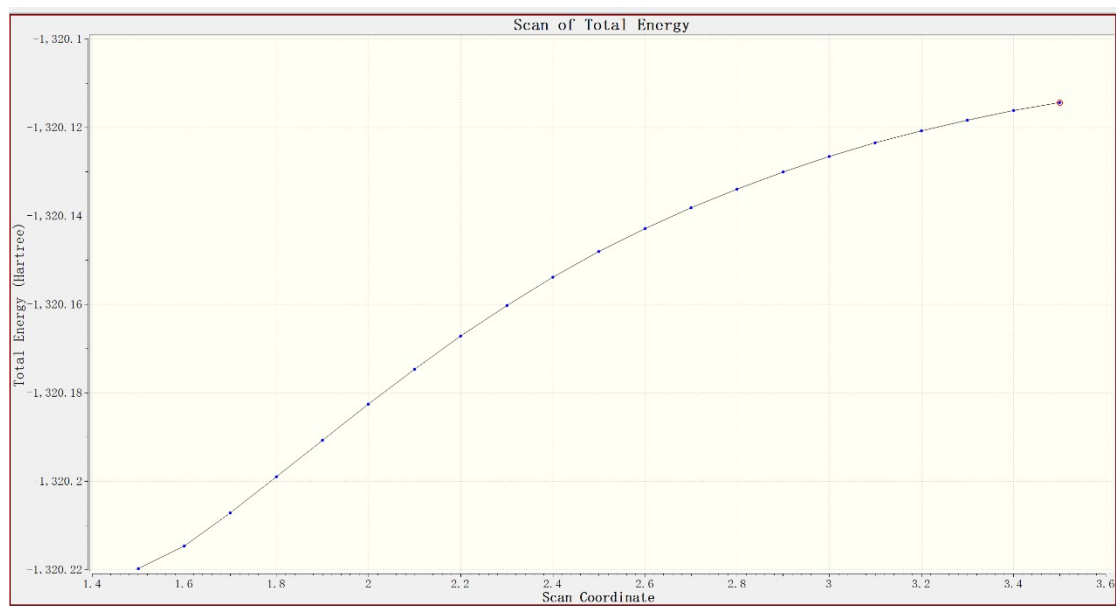

Figure S8 The scanning results of potential energy surface for coupling process between lithium formate radical and  $\text{PO}^{\bullet}$  radical.

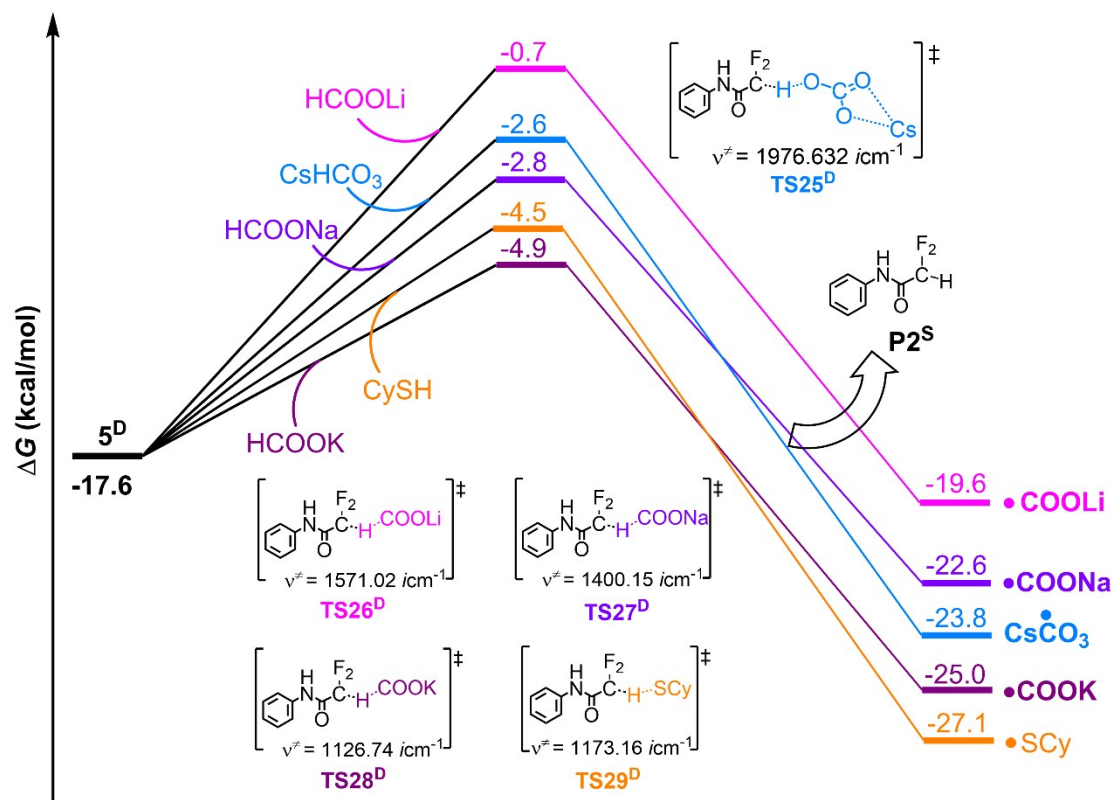

Figure S9 Different paths of N-phenyl-2,2,2-difluoromethylacetamide radical  $5^D$  hydrodefluorination.

## References

- 1 M. J. Frisch, G. W. Trucks, H. B. Schlegel, G. E. Scuseria, M. A. Robb, J. R. Cheeseman, J. A. J. Montgomery, T. Vreven, K. N. Kudin and J. C. Burant, et al. Gaussian 09, revision D. 01; Gaussian, Inc.: Wallingford, CT, 2009.
- 2 A. D. Becke, *J. Chem. Phys.*, 1993, **98**, 5648–5652.
- 3 P. J. Stephens, F. J. Devlin, C. F. Chabalowski and M. J. Frisch, *J. Phys. Chem.*, 1994, **98**, 11623–11627.
- 4 N. Shen, R. H. Li, C. Liu, X. Z. Shen, W. Guan and R. Shang, *ACS Catal.*, 2022, **12**, 2788–2795.
- 5 S. Grimme, J. Antony, S. Ehrlich and H. Krieg, *J. Chem. Phys.*, 2010, **132**, 154104.
- 6 F. Weigend and R. Ahlrichs, *Phys. Chem. Chem. Phys.*, 2005, **7**, 3297–3305.
- 7 F. Weigend, *Phys. Chem. Chem. Phys.*, 2006, **8**, 1057–1065.
- 8 Tomasi J, Mennucci B, Cammi R. *Chem. Rev.*, 2005, **105**, 2999–3094.
- 9 A. V. Marenich, C. J. Cramer and D. G. Truhlar, *J. Phys. Chem. B*, 2009, **113**, 6378–6396.
- 10 T. Lu and F. W. Chen, *Multiwfn: A Multifunctional Wavefunction Analyzer. J. Comput. Chem.*, 2012, **33**, 580–592.
